# Supplementary material for: Technical note: Large offsets between different datasets of sea water isotopic composition: an illustration of the need to reinforce intercalibration efforts
Source: Copernicus journal article supplement (doi:10.5194/egusphere-2024-3009), 2024-10-01
Supplement: Supplementary file [file egusphere-2024-3009-AC1-supplement.pdf]

1 Initial paper submitted to OS 25/09 2024

2 RC1

3 General comments: This short note presents some seawater oxygen and hydrogen isotope data  
4 generated in the lead author's laboratory, and conducts a comparison with other datasets from  
5 the same ocean regions generated in other labs. The major finding appears to be that there are  
6 troubling differences in the data, possibly instrumental or procedural in origin. Whilst  
7 concerning, this is not an especially surprising finding – I think that most scientists who work  
8 with such data are quite attuned to the possibility of inter-laboratory offsets, and in many  
9 cases will conduct their own ad-hoc comparisons to try and make datasets consistent where  
10 possible.

11 Different instrumentation and protocols could be partly to blame, in some cases, and the paper  
12 outlines the possible origins of some of these differences. I suspect that long-term  
13 maintenance of standards is also an issue – while all samples are supposed to be measured  
14 relative to known standards (e.g. VSMOW), the cost and availability of VSMOW is such that  
15 samples are virtually never measured against it directly, but instead against intermediate  
16 (secondary) laboratory standards, which are themselves measured relative to e.g. VSMOW.  
17 Any drift or inaccuracy in the known composition of these secondary standards will thus feed  
18 through into the data.

19 **Au:** we fully agree about the issue of drifting or uncertain secondary standards, or opening  
20 too many times the small VSMOW standard bottle (we had mentioned 'uncertainties in  
21 reference materials used', but will make that clearer). This could result in biases in estimated  
22 isotopic values (often too low values). There are published recommendations (from IAEA) on  
23 how to keep the secondary standards for a long time free of noticeable drifts, which some  
24 groups (but not all) follow. Even though, we are aware of the importance to check at relative  
25 intervals whether the standards are kept in good condition, and the possibility of small errors  
26 due to that still sneaking in (in  $\delta^{18}\text{O}$ , possibly on the order of 0.01 to 0.02 ‰).

27 The current paper does a reasonable job of highlighting these sorts of issues in the context of  
28 the datasets examined, but overall the treatment is relatively superficial. The analysis  
29 essentially compares a couple of datasets and considers whether differences might be “real”  
30 (i.e. deriving from oceanic temporal or spatial variability), before concluding that they are  
31 most likely not. One could argue that an even more useful analysis would assess all available  
32 public isotope datasets and conduct some sort of crossover analysis that would tabulate  
33 offsets. (I believe such an activity is being conducted at AWI Bremerhaven, and I note the  
34 acknowledgement to one of the key researchers there – perhaps there is scope to ramp up that  
35 dialogue and deepen the analysis presented here, especially given AWI representation  
36 amongst the authorship team for this paper?). This would enable the full extent of the problem  
37 to be at least quantified, and possibly its root causes to be better identified, if the derived  
38 offsets were categorised by method, protocol, instrumentation etc. I realise this is a much  
39 bigger job than the authors intended to undertake, but I feel it would be significantly more  
40 useful.

41 **Au:** We thank the reviewer for the feedback and insight. We are aware of two such efforts  
42 (one at AWI (Bremerhaven, Ge), and one at LOCEAN-LSCE (Paris, Saclay, Fr)) to  
43 systematically compare a large ensemble of different (water column) water isotopes data sets,

44 and to characterize relative biases. This is a very valuable effort that we did not want to  
45 duplicate in this study. We would like to point out that there is a large amount of data that are  
46 surface (or near-surface/upper ocean only), in particular in tropical oceans (but also subpolar  
47 gyres, and even in the Southern Ocean), and that are not included in these other investigations  
48 (based on the surveys we have, probably more than half the data). The interest of our present  
49 study, as we fully agree, just aimed at illustrating the issue on a few cases. Consequently, we  
50 examine a few different data sets containing data rather close in time and space, albeit not as  
51 close as wished for, which allows to quite well identify the systematic differences. This is  
52 done to raise awareness, which does not seem to be shared by all data producers, to the best of  
53 our knowledge, and to promote further crossover investigation in the recently approved  
54 SCOR WG 171 – MASIS, an effort similar to what you propose.

55 Concerning ways forward, I think a minimum requirement of the paper should be a clear  
56 statement on how the issue should be addressed in future. The paper alludes to some possible  
57 methods that might be used to alleviate/address the problem (e.g. exchange of samples  
58 between labs), but what is needed are firm recommendations and suggestions for who can  
59 follow them up and (critically) who should oversee the process. For example, it is worth  
60 noting that GO-SHIP has established protocols to deal with exactly this issue for other  
61 variables to ensure their intercomparability, and might be well-placed to transfer/apply those  
62 protocols to seawater isotope data also. Alternatively, possibly IAPSO has a role?

63 **Au:** we fully agree with that. This is one of the objectives of SCOR WG 171 – MASIS  
64 (Towards best practices for Measuring and Archiving Stable Isotopes in S seawater) that two of  
65 the authors co-chair, and which is just being established this month. We have already set-up  
66 different data exchange protocols, and started exchanging samples (and will include the AWI-  
67 Bremerhaven austral ocean effort, piloted by Alexander Haumann, who is also a member of  
68 the working group). As this is now official, we have added a paragraph on it to the note.

69 Comment (not included in the note): We have also been in touch with GO-SHIP co-  
70 chairpersons, and will make a more official presentation on what we plan (the aim is to move  
71 ‘water isotopes’ from a parameter of class 3 to a parameter of class 2 in GO-SHIP). We are  
72 also in touch with IAPSO (but for  $\delta^{13}\text{C-DIC}$ ), and will liaise with the IOC UNESCO Ocean  
73 Best Practices Group. We contemplated submitting last year a proposal on ‘water isotopes’ to  
74 IAPSO, but timing was short, and we thought that it would weaken the SCOR WG proposal  
75 and delay actions in too many different entities.

76 What is definitely not wanted is each lab or user conducting their own  
77 intercomparison/correction exercises, since the resulting datasets (while internally more  
78 consistent than before) will still not be comparable across them all, if different methods to  
79 intercompare/correct are used.

80 **Au:** We fully agree. This was one of the main reasons why we decided to set up the SCOR  
81 working group MASIS.

82 Overall, the paper highlights an issue that is concerning but not surprising. I have no objection  
83 to the paper being published – I believe what it says is true, and the topic is an important one  
84 – but a fuller treatment of the issue would be even more beneficial to the community,  
85 including very specific recommendations on how it should be addressed.

86

87 **Au:** Thank you for your comment.

88

89 Minor points.

90 Title: perhaps should mention "... and suggested ways forward", or suchlike? Highlighting  
91 the issue is important, but even more useful would be outlining what needs to be done to  
92 resolve it.

93 **Au:** This is an interesting suggestion, but we feel that this is outlined in some way in the  
94 second part of the title, and thus plan to keep the title as is.

95 Abstract: Is written from the context of comparing LOCEAN datasets to others, which is  
96 sensible (I'm sure it is what the authors' starting point was) – but perhaps just saying  
97 "intercomparing available public datasets" would be more balanced?

98 **Au:** We agree and changed the text accordingly.

99 Line 22. "carried out"?

100 **Au:** Done

101 Line 24. Punctuation is important here: "... between data sets, which exceed 0.1 in d18O and  
102 0.5 in d2H, ..." – the commas matter!

103 **Au:** Done

104 Page 1 and 2. Just a stylistic thing, but these paragraphs are really long... it would help the  
105 reader to break them into smaller chunks.

106 **Au:** Thank you. This is implemented.

107 Line 123. When examining offsets, it's a bit unsatisfying that the isotope data from Polarstern  
108 were not collected from the same waterline as the TSG. Some quantification of the impact of  
109 this would be useful, especially if the sensors/intake were at different depths and/or different  
110 positions on the hull.

111 **Au:** Yes, this is unfortunate, but the isotopic samples were probably collected there, because  
112 of easier access to the water line. Author GR has been involved in studies of vertical near  
113 surface ocean salinity stratification in a working group set up by spatial agencies (EA and  
114 NASA). In the RV Polarstern data set, we found a few instances near Svalbard (Arctic Ocean)  
115 and in the Southern Ocean where there was obvious salinity and water mass origin  
116 stratification. This is also one reason why we restricted the comparisons to regions where  
117 such large stratification is usually not taking place. Nonetheless, a salinity stratification of (at  
118 most) a few 0.01 pss is always possible between the two levels, even in the best  
119 circumstances. Such instances (mostly in the tropics) were commented in Jacqueline Boutin,  
120 Yi Chao, William E. Asher, Thierry Delcroix, D. Drucker, et al., Satellite and In Situ Salinity:  
121 Understanding Near-Surface Stratification and Subfootprint Variability. Bulletin of the  
122 American Meteorological Society, 2016, 97 (8), pp.1391-1407. 10.1175/BAMS-D-15-

123 00032.1. hal-01360859 (and references here-in, in particular, Henocq et al. (2010): Vertical  
124 variability of near-surface salinity in the tropics: Consequences for L-band radiometer  
125 calibration and validation. *J. Atmos. Oceanic Technol.*, **27**, 192–209,  
126 doi:10.1175/2009JTECHO670.1. (in that paper, one of the authors, GR, had compared the  
127 salinities from the Polarstern two water lines, which were often available at the time).

128 Line 202. ACC fronts are usually capitalised – “Polar Front” etc.

129 **Au:** Thank you. Done.

130 Various places. “pss” seems to have crept in as a salinity unit. If the data are indeed measured  
131 and presented on the practical salinity scale (as stated), then the salinities are ratios and hence  
132 do not have units.

133 **Au:** We explicitly mention that practical salinity has no unit. We removed other later  
134 mentions in the draft, but left it on the figures, as to not leave any doubt that what we plot is  
135 practical salinity, according to the 1978 ‘scale’.

136

137

138

139

140 • **Citation:** <https://doi.org/10.5194/egusphere-2024-3009-RC1>

141 • **RC2:** ['Comment on egusphere-2024-3009'](#), Anonymous Referee #2, 05 Nov 2024 [reply](#)

142 Review

143

144 **Technical note: Large offsets between different datasets of sea water isotopic**  
145 **composition: an illustration of the need to reinforce intercalibration efforts**

146 Gilles Reverdin, Claire Waelbroeck, Antje H. L. Voelker, Hanno Meyer

147

148 This technical note highlights the important consideration of systematic offsets between  
149 seawater isotopic values measured using different instrumentation and/or in different  
150 laboratories. Isotopic measurements have been largely underutilized to-date, and being able to  
151 reliably compare data collected and/or analyzed by different parties will be key in developing  
152 a cohesive understanding of the ocean isotopic system.

153

154 The authors highlight the need for establishing “well-accepted systematic guidelines for

155 data production and quality control”. Further, they advocate “enhancing scientific exchange  
156 between the different institutes needs to be actively pursued, in order to reduce the errors  
157 when merging different datasets”. I strongly agree with these main  
158 conclusions/recommendations, and feel that ongoing, wide-spread cross-calibration between  
159 institutes and research groups is the only way to achieve this.

160 **Au:** Thank you.

161

162 While I am in agreement with the overall intention of the paper, I think it is difficult to make  
163 this point, as presented, using surface samples alone. Some deeper digging beyond the offsets  
164 being 'rather systematic' would help strengthen the case.

165 **Au:** (also, in response to comment by RC1) We agree that there is a strong interest in digging  
166 further in particular with water column (and deep ocean) data. We are aware of two such  
167 efforts (one at AWI and one at LOCEAN-LSCE) to systematically compare a large ensemble  
168 of different (water column) water isotopes data sets, and characterize relative biases. This is a  
169 very valuable effort that we did not want to duplicate in this study. We would like to point out  
170 that there is a large amount of data that are surface (or near-surface/upper ocean only), in  
171 particular in the tropical oceans (but also subpolar gyres, and even Southern Ocean), and that  
172 are not included in these other investigations (based on what we are aware of, probably more  
173 than half the data). The interest of our present study, which is only aimed at illustrating the  
174 issue on a few cases, is that we have rather close in time and space data of the different data  
175 sets, albeit not as close as wished for, which allows to quite well identify the systematic  
176 differences. This is done to raise awareness, which does not seem to be shared by all data  
177 producers to the best of our knowledge, and promote further crossover investigation, such as  
178 the one you propose.

179

180 There are a few main points in the text that I feel could be addressed more carefully and/or  
181 given some more thought and discussion.

182

### 183 **Main point 1**

184 This technical note focuses on surface water samples. Surface waters are much more variable  
185 seasonally and geographically than deep water masses due to  
186 evaporation/precipitation/freezing/melting. While this is acknowledged within the paper, I'm  
187 not totally convinced that the offsets observed between the relatively limited datasets are  
188 lab/method based rather than seasonal and/or geographic differences.

189 **Au:** Cf response above. We are fully aware of issues of the imprint from air sea (and sea-  
190 ice/liquid water) exchange, which is what motivates some scientists (including some of the  
191 co-authors) to have collected these surface samples. Based on our experience (one of the  
192 authors, GR, has published different studies on evaporation isotopic properties, as well as  
193 investigation on rainfall or sea ice melting/freezing imprint on near-surface isotopic  
194 composition), this is what motivates the restriction of the domains upon which we

195 intercompare the different data sets (tropics, sub-tropics and mid-latitudes to temperate  
196 Southern Ocean areas). In these regions, and although one has to be quite careful, we have  
197 some idea of what maximum seasonal cycle or interannual variability are in water isotope-  
198 SSS coordinates averaged over regional scales. At first glance, they appear to be smaller than  
199 when considering the surface variability at a fixed location, as salinity and isotopic  
200 composition tend to co-vary seasonally. We are aware that we do not have the in-situ data to  
201 fully test the impact of seasonal and interannual variability in the south-eastern Indian Ocean  
202 or in the southern Atlantic Ocean in isotope-S space, but our guess is that this source of  
203 variability is not the largest cause of the differences that we identify. This is an interesting  
204 topic for further research in simulations of earth system models enabling water isotopes, but it  
205 has not yet been done systematically, as far as we can tell (for example, simulations exist both  
206 for MPI model (Xu et al., Geosci. Model Dev., 5, 809–818, 2012 [www.geosci-model-](http://www.geosci-model-dev.net/5/809/2012/)  
207 [dev.net/5/809/2012/](http://www.geosci-model-dev.net/5/809/2012/), doi:10.5194/gmd-5-809-2012), in iCESM (Brady et al., 2019, Journal of  
208 Advances in Modeling Earth Systems, 11, 2547–2566.  
209 <https://doi.org/10.1029/2019MS001663>), and in the IPSL model).

210 Without many similar datasets demonstrating the extent of natural variability, or direct  
211 replicate analyses performed at different labs, it's difficult to make a convincing case that the  
212 reported differences are analytical offsets and not observed natural geographic/temporal  
213 variation. In absence of direct replicate analysis/cross-calibrations, the exercise detailed in  
214 this paper may be better performed with deep water samples, with less variable isotopic  
215 compositions.

216 **Au:** We fully agree that deep water samples are best for that, but we unfortunately do not  
217 have similarly located deep water samples in the three data sets compared here. Deep samples  
218 collected at the same site are rarely available, which is why other paradigms/approaches are  
219 needed, as is been done in the Southern Ocean by at least two research groups. Although we  
220 have only limited understanding of the observed natural geographic/temporal variation, we  
221 found that the surface comparison approach is a complementary useful approach.

222

## 223 **Main point 2**

224 I have a hard time recommending the application of a 'correction' offset between datasets  
225 without a direct cross-calibration between the two labs, it is impossible to know if the  
226 difference in values is an offset (from technique, reference material, or sample evaporation),  
227 or a true difference.

228 While correcting for a calibration offset between labs could be acceptable with appropriate  
229 inter-lab cross-calibration efforts, trying to 'correct' data where samples may have been  
230 compromised involves considerable risk, and could instill a false sense of confidence in  
231 intercomparison efforts.

232 **Au:** (also cf response to comment RC1) We fully agree that direct 'cross-calibration efforts'  
233 are required, and that is what we promote in the SCOR WG 171 – MASIS, which is just been  
234 set up this month, and which is co-chaired by two of the co-authors of the paper. Indeed, it is  
235 in some instances difficult to fully identify the reason of the offset. However, in the LOCEAN  
236 data set, there were some clear instances, in particular for earlier data sets but even during one  
237 recent cruise, of sample evaporation having taken place; in these instances, if evaporation was

238 low, an adjustment is proposed for cases when the suggested adjustment is less than 0.1/0.2 in  
239  $\delta^{18}\text{O}/\delta^2\text{H}$  (with a flag specifying “probably good”). Furthermore, in the case of the RV  
240 Polarstern data set analyzed at AWI-Potsdam, an offset in a reference material had been  
241 identified, post initial data publication, which has been corrected before making the  
242 comparison provided here. In other instances, reference material offsets happen that need to  
243 be carefully identified to provide full confidence in the inter-comparison effort. We are,  
244 however, aware that remaining offsets on the order of 0.01 to 0.02‰ in  $\delta^{18}\text{O}$  due to  
245 uncertainties in secondary reference materials might sneak in the data, even in the best  
246 managed laboratories (at least, this is the case at LOCEAN).

247

248 More recently published material indicates that differences between analytical techniques (i.e.  
249 IRMS vs CRDS) are insignificant (i.e. less than analytical precision). Reference material  
250 errors can occur, and the only way to identify that for certain is cross-calibration between the  
251 facilities in question. Unfortunately, facilities are often reluctant to spend the time/resources  
252 on cross calibration, claiming that if all labs are (e.g.) referenced against VSMOW, then there  
253 is no need (which is of course true, in theory, but not all labs operate the same way with  
254 regards to calibration, replication, etc.). This is a problem that must be solved with buy-in  
255 across the community, and a commitment to a longer-term vision of isotopic data (vs short-  
256 term focus on a study from a single cruise, where offsets between labs/instruments are often  
257 immaterial).

258 **Au:** We fully agree that this is an issue that must be solved with a long-term vision across the  
259 community, and strongly support this buy-in vision. We’d like to point out that although there  
260 are published indications that differences between analytical techniques (for  $\delta^{18}\text{O}$  between  
261 IRMS with  $\text{CO}_2$  equilibration and CRDS (at least Picarro-based)) are less than analytical  
262 uncertainties, this is not a universally recognized vision (L. Wassenaar, pers. communication,  
263 or different papers on effects on the water isotope measurements of dissolved salts, including  
264 one at LOCEAN by Benetti et al. (2017)). Thus, it might be by chance that they are so similar  
265 (we believe that there are larger differences in the case of  $\delta^2\text{H}$ , or for other IRMS  
266 measurement methods for  $\delta^{18}\text{O}$ , but this would need to be investigated further).

267

268 An offset resulting from sample compromise prior to analysis is the most difficult case.  
269 Unless the offsets are very large, it is not truly possible to know which samples may have  
270 been subject to evaporation during storage, or to what extent. Even if we can be confident that  
271 some samples from a cruise were compromised, it cannot be assumed that each sample was  
272 subject to the same amount of evaporation/fractionation offset. An attempt to correct some  
273 number of collected samples from a dataset could have the unintended consequence of  
274 unnecessarily offsetting samples within that set that were not actually subject to  
275 compromise/evaporation. My opinion is that the best approach in this scenario is to discard  
276 the data that has clearly been compromised (i.e. well outside of established natural variability)  
277 and leave the rest alone.

278 **Au:** Cf response above. With CRDS measurements, we based this evaluation of sample  
279 compromise (mainly, possible evaporation) on their d-excess value (which, if outside  
280 acceptable ranges, is then flagged as probably bad), as well as on visual inspection of the  
281 bottles and the caps. Users of the LOCEAN data base are free to discard samples that have

282 been lightly compromised before analysis (based on the ‘probably good’ quality flag). Note  
283 that we have chosen to retain them in the comparisons presented in this paper, as they have no  
284 statistical effect on the comparisons provided.

285 Unless a direct inter-lab cross-calibration has been performed, I would rather not see  
286 ‘correction’ offsets applied to datasets in attempt to make them more comparable. Without the  
287 cross-calibration data, there is simply no way to know whether one is truly making the  
288 correction they think they are.

289 **Au:** Thank you for your opinion. We promote direct inter-lab comparison calibration, but  
290 unfortunately this is not always available (this was not the case for one of the data sets of this  
291 paper, despite our attempts), and furthermore, an a posteriori inter-comparison would not  
292 necessarily be relevant to the earlier analyzed data set. Thus, we have to conclude that it will  
293 be in some instances necessary to apply ‘correction’ offsets, as a secondary and more  
294 uncertain approach to the more direct inter-lab comparison.

295

296 --

297 **A few specific minor points:**

298

299 **L40:** Glacial melt from ice shelves can impact isotopic composition well below the surface  
300 ocean – down to 800m in the Amundsen Sea, Antarctica. (Biddle et al., 2019; Hennig et al.,  
301 2024; Randall-Goodwin et al., 2015)

302 **Au:** Thank you; this was added.

303

304 **L66:** More recent studies have demonstrated significantly better precision with CRDS  
305 systems - on par, or better than most published IRMS data. (0.025‰ in  $\delta^{18}\text{O}$ . Current  
306 manufacturer-stated precision for Picarro systems is  $\pm 0.025\text{‰}$  in  $\delta^{18}\text{O}$  and  $\pm 0.1\text{‰}$  for  $\delta\text{D}$ ).  
307 Voelker et al., (2015) achieved precision of  $\pm 0.06\text{‰}$   $\delta^{18}\text{O}$  (in-run precision  $\pm 0.1\text{‰}$   $\delta^{18}\text{O}$ ;  
308  $\pm 1\text{‰}$   $\delta\text{D}$ ), while Hennig et al., (2024) achieved precision of  $\pm 0.02\text{‰}$   $\delta^{18}\text{O}$  (in-run precision  
309 of  $\pm 0.04\text{‰}$   $\delta^{18}\text{O}$ ). I’m not sure whether an advancement in technology, or a change in  
310 methodology is responsible – but it doesn’t seem that modern precision is meaningfully  
311 different between IRMS and CRDS.

312 **Au:** Some groups in the past (still, now) provided IRMS data with similar ‘high’ precision,  
313 but not all. I agree that there has been great progress with CRDS measurements, but there is  
314 still sometimes a large issue of salt accumulation and its impact on memory effects during  
315 runs. It is something that is present at LOCEAN, and for which the current solution is to run  
316 reference materials through the runs with values close to the sample values analyzed. In that  
317 respect, the situation is much worse for isotopic composition in salt water than in freshwater  
318 (a solution that was earlier adopted at LOCEAN was to distillate the water samples prior to  
319 analysis, but at great time cost). Note that memory effects could arise in IRMS measurements  
320 too (but not due to salt).



321

322 **L78:** Is this significant? Other studies (Hennig et al., 2024; Walker et al., 2016) showed  
323 equivalence within instrumental precision between IRMS and CRDS techniques. I'm not sure  
324 one can analytically justify applying an offset to data that is smaller than analytical precision.

325 **Au:** Yes, this effect can be highly significant, unfortunately (see comment above, based on  
326 experience gathered at LOCEAN on CRDS). Fortunately, this can be (partially) mitigated.

327
